# Supplementary material
Source: Springer Nature journal article supplement (https://www.springermedizin.de/resource/supplementary/13561_2012_47_MOESM1_ESM.pdf/9687368)

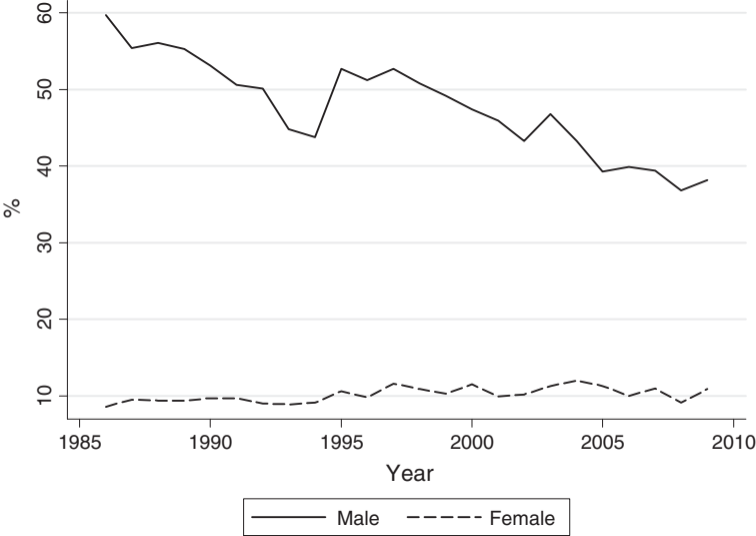

Supplement: MOESM1 [file 9687368]
